# Supplementary material for: Minimally Invasive Versus Sternotomy for Mitral Surgery in the Elderly: A Systematic Review and Meta-Analysis
Source: PubMed Central journal article supplement — Innovations (Phila). 2021 Mar 30;16(4):310–6. doi: 10.1177/15569845211000332 (PMC8414825; doi:10.1177/15569845211000332), 2021-03-30
Supplement: sj-pdf-1-inv-10.1177_15569845211000332.pdf [file sj-pdf-1-inv-10.1177_15569845211000332.pdf]

**Supplemental Table.** Newcastle-Ottawa Quality Assessment Scale.

| Study                                             | Selection                                       |                                                      |                                  |                                                                                 | Comparability                                                          | Outcome                      |                                                        |                                         | Quality Score |
|---------------------------------------------------|-------------------------------------------------|------------------------------------------------------|----------------------------------|---------------------------------------------------------------------------------|------------------------------------------------------------------------|------------------------------|--------------------------------------------------------|-----------------------------------------|---------------|
|                                                   | <b>Representativeness of the exposed cohort</b> | <b>Selection of the non-exposed cohort</b>           | <b>Ascertainment of exposure</b> | <b>Demonstration that outcome of interest was not present at start of study</b> | <b>Comparability of cohorts on the basis of the design or analysis</b> | <b>Assessment of outcome</b> | <b>Was follow-up long enough for outcomes to occur</b> | <b>Adequacy of follow-up of cohorts</b> |               |
| 7 studies that were included in the main analysis |                                                 |                                                      |                                  |                                                                                 |                                                                        |                              |                                                        |                                         |               |
| Holzhey et al., 2011                              | Somewhat representative★                        | Drawn from the same community as the exposed cohort★ | Secure record★                   | Yes★                                                                            | Propensity-matched comparison★★                                        | Record linkage★              | Yes★                                                   | Complete follow-up★                     | Good          |
| Santana et al., 2011                              | Selected group                                  | Drawn from the same community as the exposed cohort★ | Secure record★                   | Yes★                                                                            | Analysis controls for some confounders★                                | Record linkage★              | Yes★                                                   | Complete follow-up★                     | Good          |

|                       |                          |                                                      |                |      |                                                                 |                 |      |                     |      |
|-----------------------|--------------------------|------------------------------------------------------|----------------|------|-----------------------------------------------------------------|-----------------|------|---------------------|------|
| Lamelas et al., 2011  | Somewhat representative★ | Drawn from the same community as the exposed cohort★ | Secure record★ | Yes★ | Analysis controls for some confounders★                         | Record linkage★ | Yes★ | Complete follow-up★ | Good |
| Iribarne et al., 2012 | Somewhat representative★ | Drawn from the same community as the exposed cohort★ | Secure record★ | Yes★ | Cohorts are comparable at baseline among demographic variables★ | Record linkage★ | Yes★ | Complete follow-up★ | Good |
| Hawkins et al., 2018  | Truly representative★    | Drawn from the same community as the exposed cohort★ | Secure record★ | Yes★ | Propensity-matched comparison★★                                 | Record linkage★ | Yes★ | Complete follow-up★ | Good |
| Losenno et al., 2019  | Truly representative★    | Drawn from the same community as the exposed cohort★ | Secure record★ | Yes★ | Cohorts are comparable at baseline among demographic variables★ | Record linkage★ | Yes★ | Complete follow-up★ | Good |

|                                                                     |                          |                                                      |                |      |                                                                 |                 |      |                     |      |
|---------------------------------------------------------------------|--------------------------|------------------------------------------------------|----------------|------|-----------------------------------------------------------------|-----------------|------|---------------------|------|
| Chen et al., 2019                                                   | Truly representative★    | Drawn from the same community as the exposed cohort★ | Secure record★ | Yes★ | Cohorts are comparable at baseline among demographic variables★ | Record linkage★ | Yes★ | Complete follow-up★ | Good |
| 3 additional studies that were included in the sensitivity analysis |                          |                                                      |                |      |                                                                 |                 |      |                     |      |
| Chen et al., 2017                                                   | Somewhat representative★ | Drawn from the same community as the exposed cohort★ | Secure record★ | Yes★ | Propensity-matched comparison★★                                 | Record linkage★ | Yes★ | Complete follow-up★ | Good |
| Peterson et al., 2018                                               | Somewhat representative★ | Drawn from the same community as the exposed cohort★ | Secure record★ | No   | No evidence of comparability between cohorts                    | Record linkage★ | Yes★ | Complete follow-up★ | Poor |
| Van laeken et al., 2019                                             | Somewhat representative★ | Drawn from the same community as the exposed cohort★ | No description | No   | Propensity-matched comparison★★                                 | Record linkage★ | Yes★ | Complete follow-up★ | Fair |
